# Supplementary material for: The High Proportion of Discordant EGFR Mutations among Multiple Lung Tumors
Source: MDPI journal article supplement (doi:10.3390/cancers14123011), 2022-06-18
Supplement: s1 [file s1]

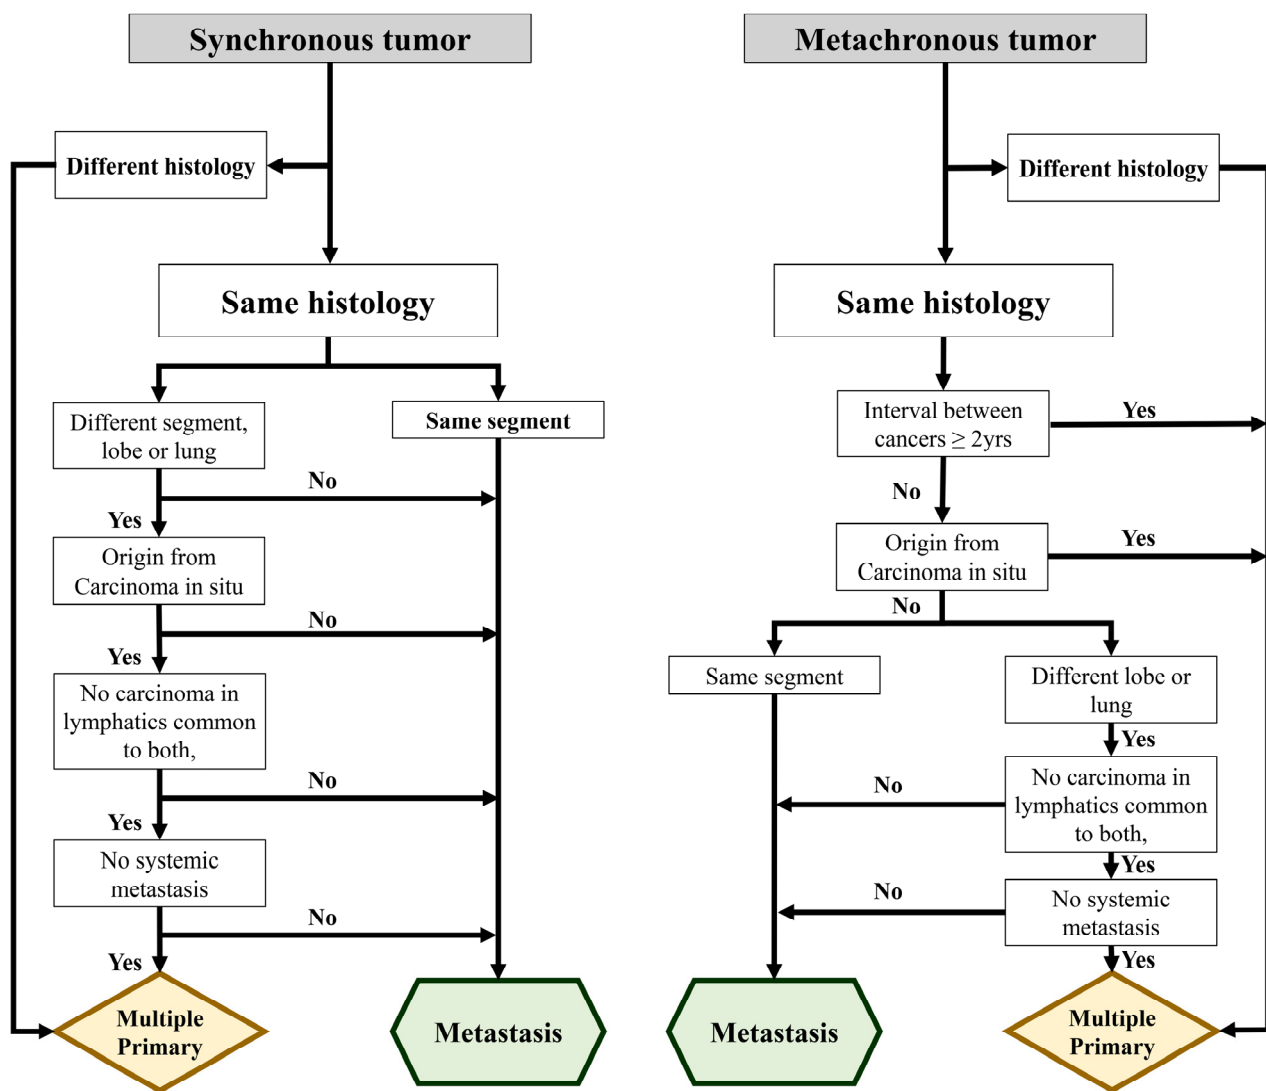

**Figure S1.** Algorithm for determining nature of multifocal lung cancer, adapted from Martini and Melamed criteria

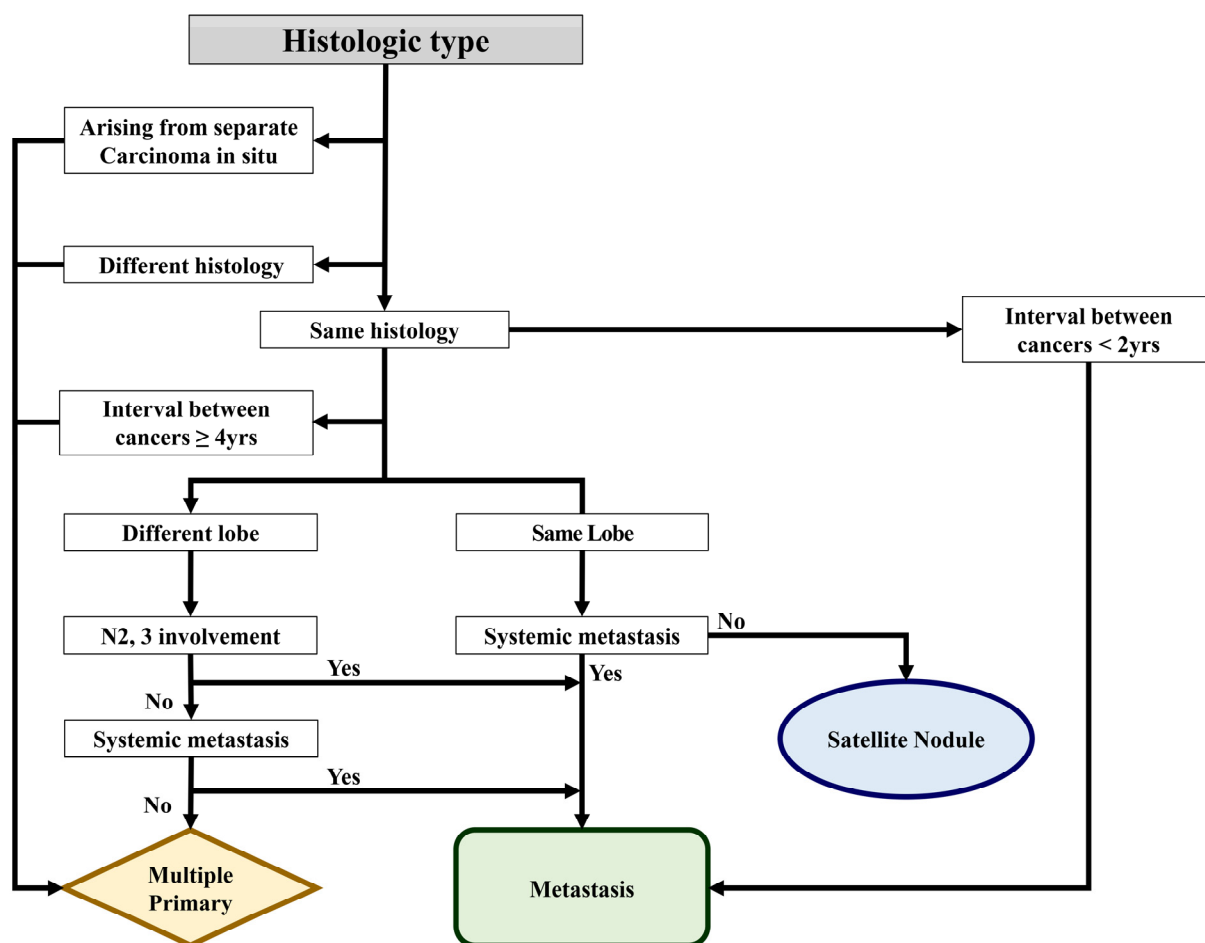

**Figure S2** Algorithm for determining nature of multifocal lung cancer, adapted from the definition of satellite nodules, multifocal primary lung cancer, and metastasis, proposed by American College of Chest Physician

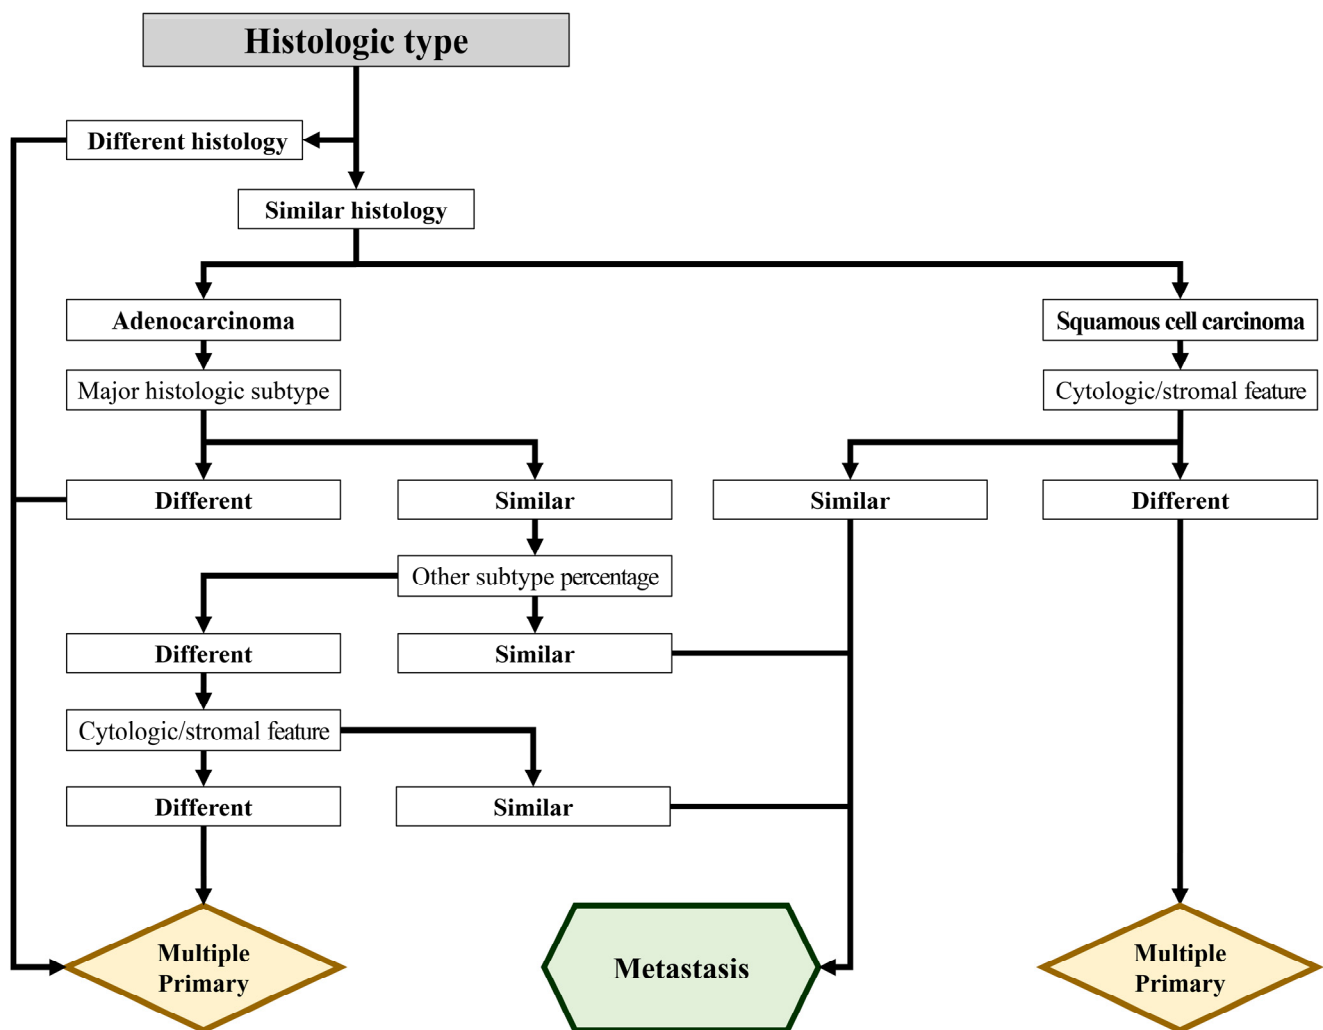

**Figure S3.** Algorithm for determining nature of multifocal lung cancer, adapted from Comprehensive histologic assessment methodology, proposed by Girard et al.

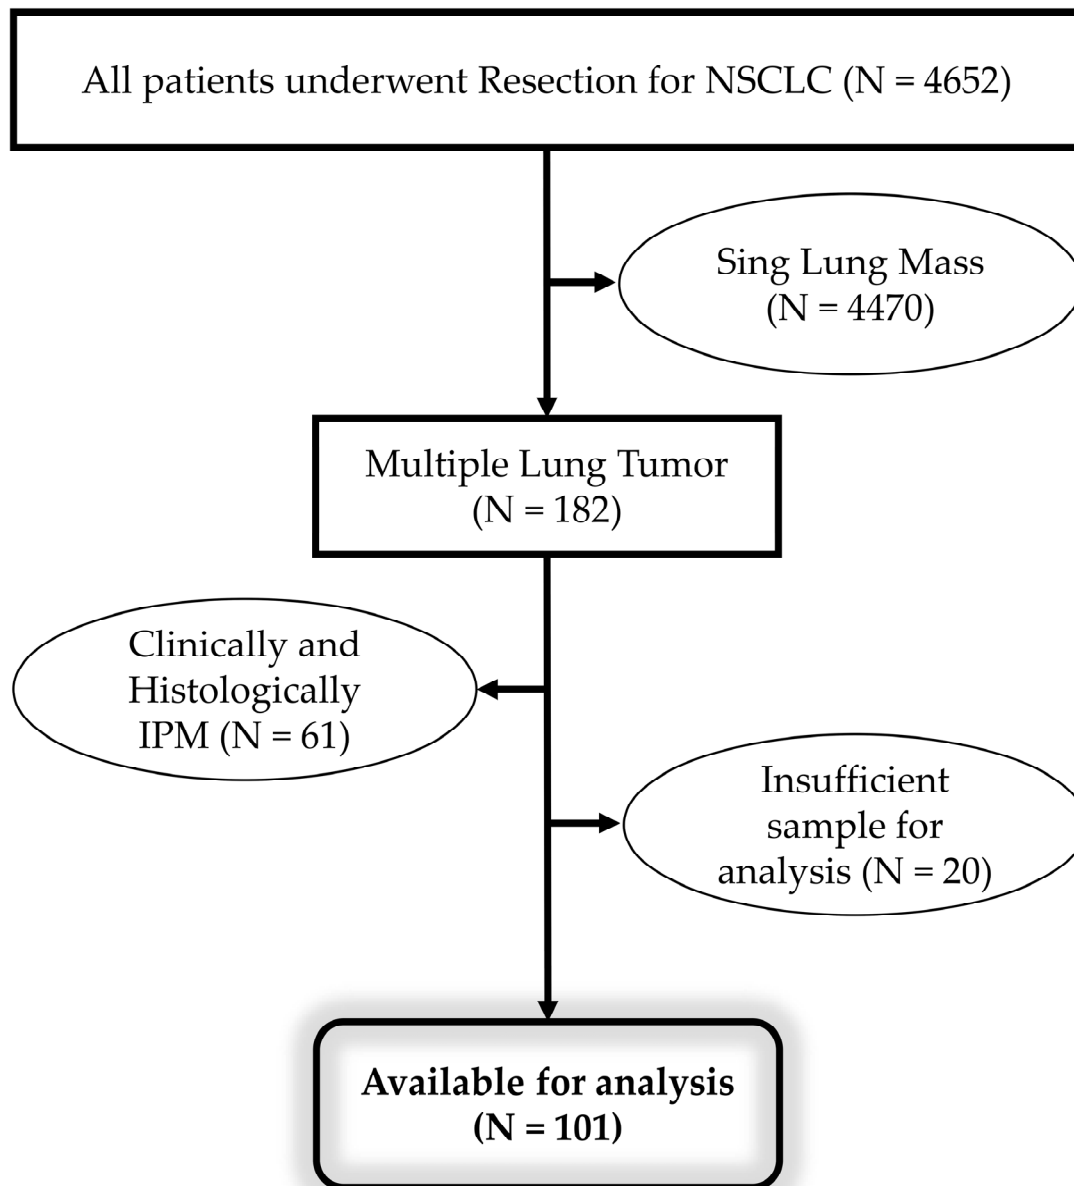

**Figure S4.** Workflow for patient selection.

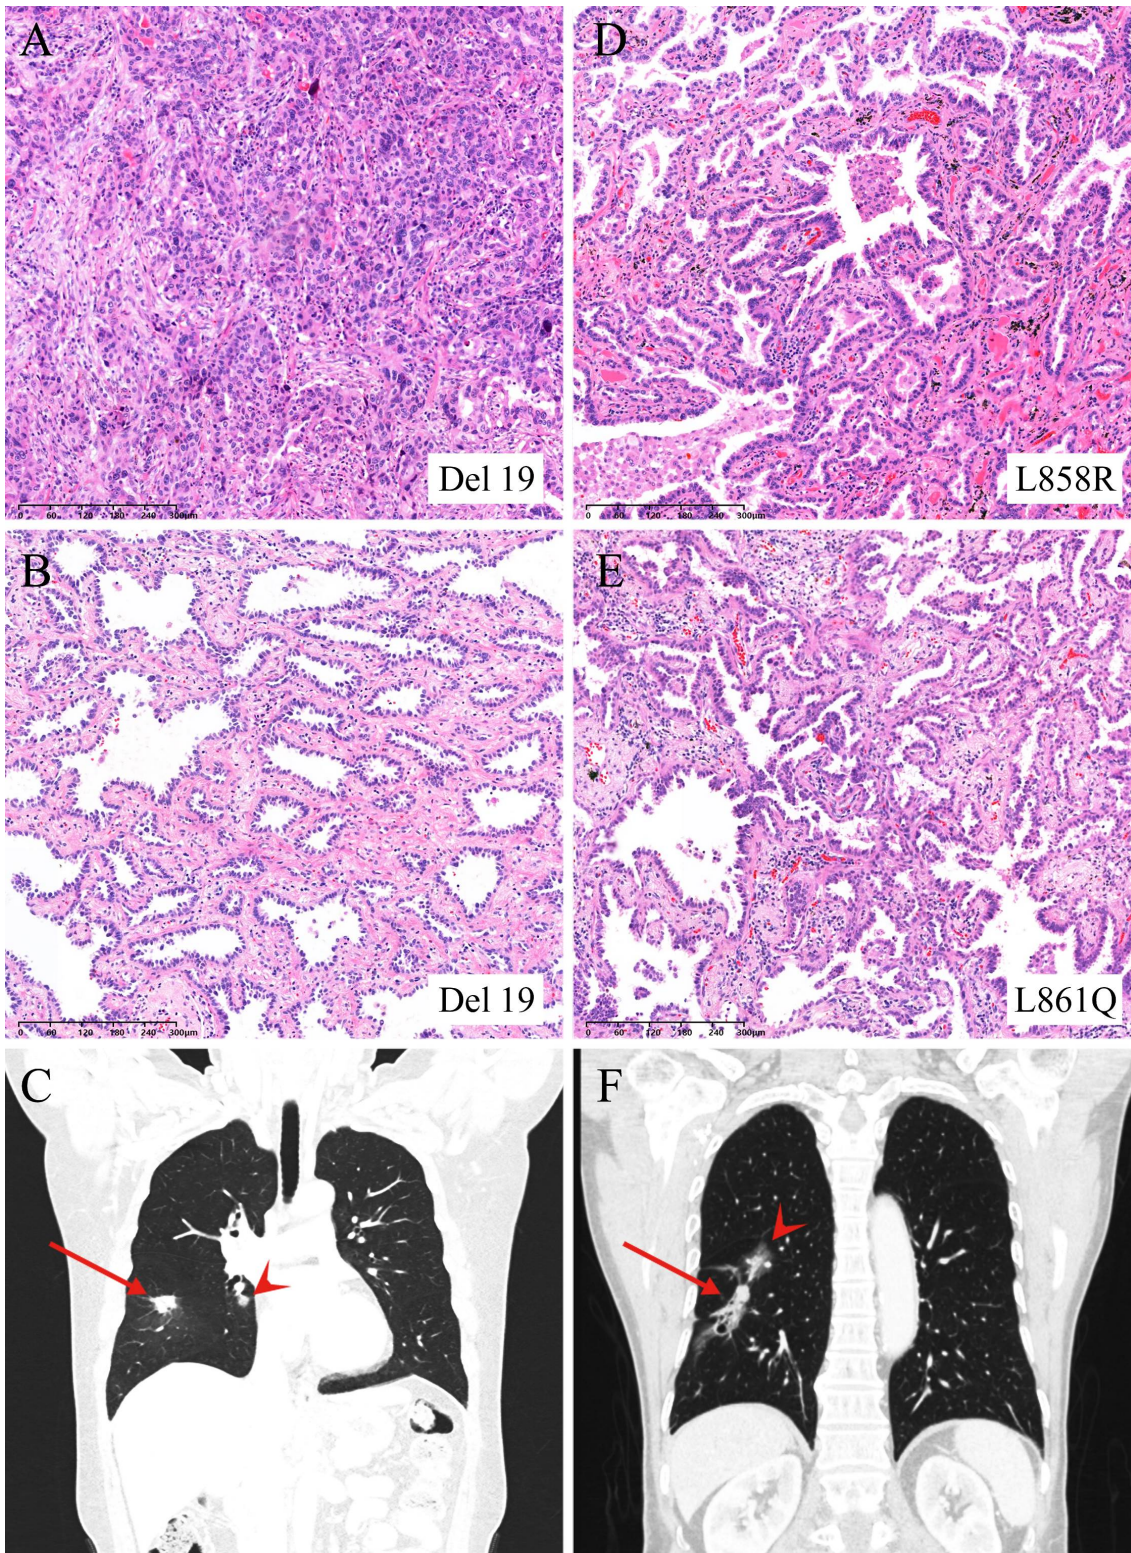

**Figure S5.** The examples of histologic feature and radiologic finding of adenocarcinomas with different histologic features (A-C) and same histologic features (D-F). The morphological subtypes of case 21 are different each other: (A) 80% Solid and 20% Acinar ( $\times 40$ ). (B) 50% Acinar, 30% Lepidic, and 20% Papillary. Both of tumors showed EGFR deletion mutation in exon 19. (C) Two tumors were located in same lobes [Arrow, tumor A; Arrowhead, tumor B]. On the other hands, case 75 showed same histology: (D) Papillary 60% and Acinar 40%. (E) Papillary 55% and Acinar 45%. (D) tumor had EGFR missense mutation in exon 21 (L858R) and (E) tumor also had EGFR missense mutation in different codon of exon 21 (L861Q). (F) Two tumors were located in different lobes [Arrow, tumor D; Arrowhead, tumor E].

Table S1. List of detectable EGFR mutation using cobas® EGFR mutation test v2

| Exon    | EGFR mutation group | EGFR Nucleic Acid Sequence |
|---------|---------------------|----------------------------|
| Exon 18 | G719X               | c. 2156G>C                 |
|         |                     | c. 2155G>A                 |
|         |                     | c. 2155G>T                 |
|         |                     | c. 2240_2251del12          |
|         |                     | c. 2239_2247del9           |
|         |                     | c. 2238_2255del18          |
|         |                     | c. 2235_2249del15          |
|         |                     | c. 2236_2250del15          |
|         |                     | c. 2239_2253del15          |
|         |                     | c. 2239_2256del18          |
|         |                     | c. 2237_2254del18          |
|         |                     | c. 2240_2254del15          |
|         |                     | c. 2240_2257del18          |
|         |                     | c. 2239_2248TTAAGAGAAG>C   |
|         |                     | c. 2239_2251>C             |
|         |                     | c. 2237_2255>T             |
|         |                     | c. 2235_2255>AAT           |
|         |                     | c. 2237_2252>T             |
| Exon 19 | Ex19Del             | c. 2239_2258>CA            |
|         |                     | c. 2239_2256>CAA           |
|         |                     | c. 2237_2253>TTGCT         |
|         |                     | c. 2238_2252>GCA           |
|         |                     | c. 2238_2248>GC            |
|         |                     | c. 2237_2251del15          |
|         |                     | c. 2236_2253del18          |
|         |                     | c. 2235_2248>AATTC         |
|         |                     | c. 2235_2252>AAT           |
|         |                     | c. 2235_2251>AATTC         |
|         |                     | c. 2253_2276del24          |
|         |                     | c. 2237_2257>TCT           |
|         |                     | c. 2238_2252del15          |
|         |                     | c. 2233_2247del15          |
|         |                     |                            |
|         |                     |                            |
| Exon 20 | S768I               | c. 2303G>T                 |
|         | T790M               | c. 2369C>T                 |
|         |                     | c. 2307_2308ins9GCCAGCGTG  |
|         |                     | c. 2319_2320insCAC         |
|         | Ex20Ins             | c. 2310_2311insGGT         |
|         |                     | c. 2311_2312ins9GCGTGGACA  |
|         |                     | c. 2309_2310AC>CCAGCGTGGAT |
| Exon 21 | L858R               | c. 2573T>G                 |
|         |                     | c. 2573_2574TG>GT          |
|         | L861Q               | c. 2582T>A                 |



Table S2. Comparison of clinicopathological parameters between *EGFR*-wildtype tumors and *EGFR*-mutant tumors

| Parameters                          | <i>EGFR</i> -wildtype ( <i>n</i> = 95) | <i>EGFR</i> -mutant ( <i>n</i> = 113) | <i>p</i> -value |
|-------------------------------------|----------------------------------------|---------------------------------------|-----------------|
| Diagnosis                           |                                        |                                       |                 |
| Adenocarcinoma                      | 71 (74.7)                              | 111 (98.2)                            | < 0.001         |
| Lepidic                             | 18 (25.4)                              | 13 (11.7)                             | 0.017           |
| Acinar                              | 36 (50.6)                              | 85 (76.6)                             | < 0.001         |
| Papillary                           | 9 (12.7)                               | 10 (9.0)                              | 0.43            |
| Solid                               | 6 (8.5)                                | 2 (1.8)                               | 0.058           |
| Micropapillary                      | 1 (1.4)                                | 1 (0.9)                               | 0.749           |
| Cribriform                          | 1 (1.4)                                | 0 (0)                                 | 0.21            |
| Squamous cell carcinoma             | 15 (15.8)                              | 2 (1.8)                               |                 |
| Mucinous adenocarcinoma             | 7 (7.4)                                | 0 (0)                                 |                 |
| Large cell neuroendocrine carcinoma | 1 (1.1)                                | 0 (0)                                 |                 |
| Adenosquamous carcinoma             | 1 (1.1)                                | 0 (0)                                 |                 |
| Tumor location                      |                                        |                                       |                 |
| Right                               | 55 (57.9)                              | 72 (63.7)                             |                 |
| Right upper lobe (RUL)              | 19 (20.0)                              | 35 (31.0)                             |                 |
| Right middle lobe (RML)             | 8 (8.4)                                | 14 (12.4)                             |                 |
| Right lower lobe (RLL)              | 28 (29.5)                              | 23 (20.4)                             |                 |
| Left                                | 40 (42.1)                              | 41 (36.3)                             |                 |
| Left upper lobe (LUL)               | 21 (22.1)                              | 11 (9.7)                              |                 |
| Left lower lobe (LLL)               | 19 (20.0)                              | 30 (26.5)                             | 0.84            |
| Upper (RUL, RML and LUL)            | 46 (48.4)                              | 79 (69.9)                             |                 |
| Lower (RLL and LLL)                 | 49 (51.6)                              | 34 (30.1)                             | 0.002           |
| T stage                             |                                        |                                       |                 |
| pT1mi                               | 15 (15.8)                              | 6 (5.3)                               |                 |
| pT1a                                | 18 (18.9)                              | 19 (16.8)                             |                 |
| pT1b                                | 33 (34.7)                              | 47 (41.6)                             |                 |
| pT1c                                | 9 (9.5)                                | 28 (24.8)                             |                 |
| pT2a                                | 15 (15.8)                              | 13 (9.7)                              |                 |
| pT2b                                | 1 (1.1)                                | 0 (0.0)                               |                 |
| pT3                                 | 2 (2.1)                                | 0 (0.0)                               |                 |
| pT4                                 | 2 (1.1)                                | 0 (0.0)                               | -               |
| Tumor size                          |                                        |                                       |                 |
| ≤ 3 cm                              | 75 (78.9)                              | 100 (88.5)                            |                 |
| > 3 cm                              | 20 (21.1)                              | 13 (11.5)                             | 0.085           |
| <i>EGFR</i> mutation                |                                        |                                       |                 |
| No mutation                         | 95 (45.7)                              | -                                     |                 |
| Exon 19 deletion                    | -                                      | 40 (19.2)                             |                 |
| L858R                               | -                                      | 66 (31.7)                             |                 |
| L861Q                               | -                                      | 3 (1.4)                               |                 |
| G719X                               | -                                      | 1 (0.5)                               |                 |
| Exon 20 insertion                   | -                                      | 3 (1.4)                               | -               |

Data are presented as number of cases (%).

Table S3. Molecular alterations analyzed using next-generation sequencing and cobas® EGFR mutation test v2 in patients with *EGFR*-mutant/wildtype tumors

| Case No. | <i>EGFR</i> -wildtype tumor |                                               |                                                        | <i>EGFR</i> -mutant tumor |                                        |                                      |
|----------|-----------------------------|-----------------------------------------------|--------------------------------------------------------|---------------------------|----------------------------------------|--------------------------------------|
|          | Location                    | Histologic diagnosis                          | Genetic alteration detected by NGS                     | Location                  | Histologic diagnosis                   | Genetic alteration detected by cobas |
| SMC009   | Left lower lobe             | Adenocarcinoma,<br>Papillary predominant      | <i>ERBB2</i> exon 20 Insertion,<br><i>CTNNB1</i> S33Y  | Left upper lobe           | Adenocarcinoma,<br>Acinar predominant  | L858R                                |
| SMC015   | Left upper lobe             | Adenocarcinoma,<br>Acinar predominant         | No mutation                                            | Left upper lobe           | Adenocarcinoma,<br>Acinar predominant  | L858R                                |
| SMC017   | Left lower lobe             | Adenocarcinoma,<br>Papillary predominant      | <i>ROS1</i> fusion                                     | Right middle lobe         | Adenocarcinoma,<br>Acinar predominant  | L858R                                |
| SMC043   | Right lower lobe            | Adenocarcinoma,<br>Micropapillary predominant | <i>BRAF</i> V600E,<br><i>CTNNB1</i> S45P               | Left upper lobe           | Adenocarcinoma,<br>Acinar predominant  | Deletion in exon 19                  |
| SMC044   | Right upper lobe            | Adenocarcinoma,<br>Acinar predominant         | <i>CDK4</i> Amplification<br><i>MDM2</i> Amplification | Left lower lobe           | Adenocarcinoma,<br>Lepidic predominant | Deletion in exon 19                  |
| SMC076   | Left lower lobe             | Adenocarcinoma,<br>Acinar predominant         | <i>EGFR</i> A289V*                                     | Left upper lobe           | Adenocarcinoma,<br>Acinar predominant  | Insertion in exon 20                 |
| SMC078   | Right lower lobe            | Adenocarcinoma,<br>Lepidic predominant        | <i>FGFR</i> Amplification                              | Right upper lobe          | Adenocarcinoma,<br>Lepidic predominant | Deletion in exon 19                  |
| SMC085   | Right lower lobe            | Adenocarcinoma,<br>Papillary predominant      | <i>BRAF</i> V600E                                      | Right upper lobe          | Adenocarcinoma,<br>Lepidic predominant | L858R                                |
| SMC100   | Left lower lobe             | Mucinous adenocarcinoma                       | <i>KRAS</i> Q61H                                       | Left upper lobe           | Adenocarcinoma,<br>Lepidic predominant | L858R                                |

\*This variant is not included in the list of detectable mutation of cobas® EGFR mutation test v2



Table S4. Comparison of clinicopathological parameters between patients with molecular-concordant and molecular-discordant tumors

| Parameter                                                   | Discordant (n = 60) | Concordant (n = 24) | p-value |
|-------------------------------------------------------------|---------------------|---------------------|---------|
| <i>EGFR</i> mutation status                                 |                     |                     |         |
| <i>EGFR</i> -mutant/ <i>EGFR</i> -mutant*                   | 16 (26.7)           | 20 (83.3)           |         |
| <i>EGFR</i> -mutant/ <i>EGFR</i> -wildtype                  | 36 (60.0)           | 0 (0.0)             |         |
| <i>EGFR</i> -wildtype/ <i>EGFR</i> -wildtype                | 8 (13.3)            | 4 (16.7)            | -       |
| Sex                                                         |                     |                     |         |
| Female                                                      | 36 (60.0)           | 19 (79.2)           |         |
| Male                                                        | 24 (40.0)           | 5 (20.8)            | 0.095   |
| Age (n, %) (years)                                          |                     |                     |         |
| < 65                                                        | 26 (43.3)           | 11 (45.8)           |         |
| ≥ 65                                                        | 34 (56.7)           | 13 (54.2)           | 1.000   |
| History of smoking                                          |                     |                     |         |
| No                                                          | 42 (70.0)           | 20 (83.3)           |         |
| Yes                                                         | 18 (30.0)           | 4 (16.7)            | 0.209   |
| Present Smoking status                                      |                     |                     |         |
| Never-smoker                                                | 42 (70.0)           | 20 (83.3)           |         |
| Ex-smoker                                                   | 13 (21.7)           | 3 (12.5)            |         |
| Current smoker                                              | 5 (8.3)             | 1 (4.2)             | 0.151   |
| Tumor location                                              |                     |                     |         |
| Unilateral side, same lobe                                  | 17 (28.3)           | 11 (45.8)           |         |
| Same segment                                                | 11 (18.3)           | 8 (33.3)            |         |
| Other segment                                               | 6 (10.0)            | 3 (12.5)            |         |
| Unilateral side, different lobe                             | 19 (31.7)           | 7 (29.2)            |         |
| Bilateral side                                              | 24 (40.0)           | 6 (25.0)            | 0.090   |
| Largest Tumor size                                          |                     |                     |         |
| ≤ 3 cm                                                      | 51 (85.0)           | 20 (83.3)           |         |
| > 3 cm                                                      | 9 (15.0)            | 4 (16.7)            | 0.849   |
| Lymph node metastasis                                       |                     |                     |         |
| Absent                                                      | 56 (93.3)           | 19 (79.2)           |         |
| Present                                                     | 4 (6.7)             | 5 (20.8)            | 0.111   |
| Histological pattern                                        |                     |                     |         |
| Concordant                                                  | 35 (58.3)           | 13 (54.2)           |         |
| Discordant                                                  | 25 (41.7)           | 11 (45.8)           | 0.727   |
| Results of Martini and Melamed criteria <sup>#</sup>        |                     |                     |         |
| Multiple primaries                                          | 32 (53.3)           | 10 (41.7)           |         |
| Metastasis                                                  | 28 (46.7)           | 14 (58.3)           | 0.469   |
| Results of comprehensive histologic assessment <sup>†</sup> |                     |                     |         |
| Multiple primaries                                          | 40 (66.7)           | 17 (70.8)           |         |
| Metastasis                                                  | 20 (33.3)           | 7 (29.2)            | 0.712   |
| Results of ACCP guideline <sup>‡</sup>                      |                     |                     |         |
| Multiple primaries                                          | 34 (56.7)           | 19 (79.2)           |         |
| Metastasis or Satellite nodule                              | 26 (43.3)           | 5 (20.8)            | 0.054   |

Abbreviation: ACCP, Americal College of Chest Physicians

Data are presented as number of patients (%).

\*Two cases with rare *EGFR* mutations were not included in this category.

<sup>#</sup>The Martini and Melamed criteria were adapted from Martini et al. [11]

<sup>†</sup>The methodology of comprehensive histologic assessment was adapted from Girard et al. [14]

<sup>‡</sup>The guideline of ACCP was adapted from Alberts et al. [12] and Shen et al. [13]
